# Supplementary material for: The Conserved Spore Coat Protein SpoVM Is Largely Dispensable in Clostridium difficile Spore Formation
Source: PubMed Central journal article supplement (PMC5607322; doi:10.1128/msphere.00315-17), 2017-09-20
Supplement: sph005172364sd7.pdf [file sph005172364sd7.pdf]

**Table S1. Strains and plasmids used in this study**

| Strain #                                            | Strain name                                      | Relevant genotype or features                                                                                                                                                    | Source/reference |
|-----------------------------------------------------|--------------------------------------------------|----------------------------------------------------------------------------------------------------------------------------------------------------------------------------------|------------------|
| <b><i>C. difficile</i> strains – JIR8094</b>        |                                                  |                                                                                                                                                                                  |                  |
| 11                                                  | JIR8094                                          | <i>erm</i> -sensitive derivat of 630                                                                                                                                             | (1)              |
| 282                                                 | JIR8094 <i>spoVM</i> <sup>-</sup>                | JIR8094 <i>spoVM::ermB</i>                                                                                                                                                       | This study       |
| 1135                                                | JIR8094 <i>CD25622</i> <sup>-</sup>              | JIR8094 <i>CD25622::ermB</i>                                                                                                                                                     | This study       |
| <b><i>C. difficile</i> strains – 630Δ<i>erm</i></b> |                                                  |                                                                                                                                                                                  |                  |
| 756                                                 | 630Δ <i>erm</i> Δ <i>pyrE</i>                    | <i>erm</i> -sensitive derivat of 630 with a deletion in <i>pyrE</i>                                                                                                              | (2)              |
| 803                                                 | 630Δ <i>erm</i> Δ <i>pyrE</i> Δ <i>IVA</i>       | 630Δ <i>erm</i> Δ <i>pyrE</i> with <i>spoIVA</i> deleted                                                                                                                         | This study       |
| 846                                                 | 630Δ <i>erm</i> -p                               | <i>erm</i> -sensitive derivat of 630 with <i>pyrE</i> restored                                                                                                                   | (3)              |
| 880                                                 | 630Δ <i>erm</i> Δ <i>IVA</i> -p                  | 630Δ <i>erm</i> Δ <i>spoIVA</i> with <i>pyrE</i> restored                                                                                                                        | This study       |
| 883                                                 | 630Δ <i>erm</i> Δ <i>IVA/IVA</i>                 | 630Δ <i>erm</i> Δ <i>spoIVA</i> with <i>spoIVA</i> in the <i>pyrE</i> locus                                                                                                      | This study       |
| 974                                                 | 630Δ <i>erm/IVA</i>                              | 630Δ <i>erm</i> with <i>spoIVA</i> in the <i>pyrE</i> locus                                                                                                                      | This study       |
| 1123                                                | 630Δ <i>erm</i> Δ <i>IVA/N491G IVA</i>           | 630Δ <i>erm</i> Δ <i>spoIVA</i> with N491G <i>spoIVA</i> in the <i>pyrE</i> locus                                                                                                | This study       |
| 1144                                                | 630Δ <i>erm/mCherry-IVA</i>                      | 630Δ <i>erm</i> with <i>mCherry-IVA</i> in the <i>pyrE</i> locus                                                                                                                 | This study       |
| 1147                                                | 630Δ <i>erm</i> Δ <i>IVA/mCherry-IVA</i>         | 630Δ <i>erm</i> Δ <i>spoIVA</i> with <i>mCherry-spoIVA</i> in the <i>pyrE</i> locus                                                                                              | This study       |
| 1220                                                | 630Δ <i>erm</i> Δ <i>pyrE VM</i>                 | 630Δ <i>erm</i> Δ <i>pyrE spoVM::ermB</i>                                                                                                                                        | This study       |
| 1222                                                | 630Δ <i>erm</i> Δ <i>pyrE 25622</i> <sup>-</sup> | 630Δ <i>erm</i> Δ <i>pyrE CD25622::ermB</i>                                                                                                                                      | This study       |
| 1269                                                | 630Δ <i>erm 25622</i> <sup>-</sup> /C            | 630Δ <i>erm CD25622::ermB</i> with <i>CD25622-spoVM</i> in the <i>pyrE</i> locus                                                                                                 | This study       |
| 1275                                                | 630Δ <i>erm VM</i> <sup>-</sup> /C               | 630Δ <i>erm spoVM::ermB</i> with <i>CD25622-spoVM</i> in the <i>pyrE</i> locus                                                                                                   | This study       |
| 1284                                                | 630Δ <i>erm 25622</i> <sup>-</sup> -p            | 630Δ <i>erm CD25622::ermB</i> with <i>pyrE</i> locus restored                                                                                                                    | This study       |
| 1286                                                | 630Δ <i>erm VM</i> <sup>-</sup> -p               | 630Δ <i>erm spoVM::ermB</i> with <i>pyrE</i> locus restored                                                                                                                      | This study       |
| <b><i>E. coli</i> strains</b>                       |                                                  |                                                                                                                                                                                  |                  |
| 41                                                  | DH5α                                             | F <sup>-</sup> Φ80 <i>lacZ</i> Δ <i>M15</i> Δ( <i>lacZYA-argF</i> ) U169 <i>recA1 endA1 hsdR17</i> (rK <sup>-</sup> , mK <sup>+</sup> ) <i>phoA supE44 λ- thi-1 gyrA96 relA1</i> | D. Cameron       |
| 195                                                 | pET22b-Δ50CPD                                    | pET22b-Δ50CPD in DH5 α                                                                                                                                                           | (4)              |
| 531                                                 | HB101/pRK24                                      | F <sup>-</sup> <i>mcrB mrr hsdS20</i> (rB <sup>-</sup> mB <sup>-</sup> ) <i>recA13 leuB6 ara-13 proA2 lavYI galK2 xyl-6 mtl-1 rpsL20</i> carrying pRK24                          | C. Ellermeier    |
| 759                                                 | pET29a/HA- <i>spoIVA</i>                         | pET29a with HA- <i>spoIVA</i> from <i>C. difficile</i> in DH5α                                                                                                                   | (5)              |
| 957                                                 | pJS107/ <i>spoVM</i>                             | pJS107- <i>spoVM</i> targeting 32 bp in HB101/pRK24                                                                                                                              | This study       |
| 1441                                                | pET22b <i>spoVM-CPD</i>                          | pET22bΔ50-CPD with <i>spoVM C. difficile</i> in BL21(DE3)                                                                                                                        | This study       |
| 1473                                                | pET28a-HA- <i>spoIVA B.s.</i>                    | pET28a with HA- <i>spoIVA</i> from <i>B. subtilis</i> in HB101/pRK24                                                                                                             | This study       |
| 1481                                                | pUC57Kan- <i>spoVM-B.s.</i>                      | pUC57Kan with <i>spoVM B.subtilis-CPD</i>                                                                                                                                        | This study       |
| 1485                                                | pET22b <i>spoVM B. subt-CPD</i>                  | pET22bΔ50-CPD with <i>spoVM B. subtilis</i> in BL21(DE3)                                                                                                                         | This study       |
| 1539                                                | pMTL-YN3                                         | pMTL-YN3 in DH5α                                                                                                                                                                 | (3)              |
| 1576                                                | pDSW1728                                         | Tetracycline-inducible <i>mCherry</i>                                                                                                                                            | (6)              |
| 1628                                                | pMTL-YN3-Δ <i>IVA</i>                            | pMTL-YN3-Δ <i>spoIVA</i> in HB101/pRK24                                                                                                                                          | This study       |
| 1662                                                | pMTL-YN1C                                        | pMTL-YN1C in HB101/pRK24                                                                                                                                                         | (3)              |
| 1684                                                | pMTL-YN1C- <i>IVA</i>                            | pMTL-YN1C- <i>spoIVA</i> in HB101/pRK24                                                                                                                                          | This study       |
| 1756                                                | pMTL-YN1C- <i>IVA N491G</i>                      | pMTL-YN1C- <i>spoIVA N491G</i> in HB101/pRK24                                                                                                                                    | This study       |
| 1768                                                | pMTL-YN1C- <i>mCherry-IVA</i>                    | pMTL-YN1C- <i>mCherry spoIVA</i> in HB101/pRK24                                                                                                                                  | This study       |
| 1770                                                | pJS107/ <i>CD25622</i>                           | pJS107- <i>CD25622</i> targeting 38 bp in HB101/pRK24                                                                                                                            | This study       |
| 1817                                                | pMTL-YN1C- <i>CD25622-VM</i>                     | pMTL-YN1C- <i>CD25622-VM</i> in HB101/pRK24                                                                                                                                      | This study       |

**Table S2. Primers used in this study.**

| Primer | Name                                       | Sequence                                                               |
|--------|--------------------------------------------|------------------------------------------------------------------------|
| 532    | 3' Universal EBS                           | CGAAATTAGAACTTGCGTTCAGTAAAC                                            |
| 1086   | 5' NdeI <i>spoVM</i>                       | AGAAGACATATGAAAGTAGTAACAATAAAATTACCAAATGG                              |
| 1087   | 3' XhoI <i>spoVM</i>                       | AGAAGACATATGAAAGTAGTAACAATAAAATTACCAAATGG                              |
| 1094   | 3' HindIII IBS <i>spoVM</i> 32             | AAA <u>AGCTT</u> TATAATTATCCTTAATTACCAAATGGTGCGCCAGATAGGGTG            |
| 1095   | 5' BsrGI EBS1 $\delta$ <i>spoVM</i> 32     | CAGAT <u>TGTACA</u> AAATGTGGTGATAACAGATAAGTCAAAATGGATAACTTACCTTTCTTTGT |
| 1096   | 5' EBS2 <i>spoVM</i> 32                    | TGAACGCAAGTTTCTAATTCGGTTGTAATCCGATAGAGGAAAGTGTCT                       |
| 1235   | 3' <i>spoVM</i> sequencing 102 bp          | GCGATTATAGATGGAGCTCC                                                   |
| 1237   | 3' XhoI <i>spoIVA</i> +TAA <i>subtilis</i> | AAAT <u>CTCGAG</u> TTACAGGATGATGGCGATTAAGCCGC                          |
| 1318   | 5' NheI HA <i>spoIVA subtilis</i>          | ATGGCTAGCTACCCGTACGACGTCCCGGATTATGCCTTGAAAAGGTCGATATTTTCAAG            |
| 1609   | 3' SalI <i>spoVM</i> no stop               | AAT <u>GTCGAC</u> ATCATTTTACTCTTTCTCATAAATTTTAGG                       |
| 1743   | 5' $\Delta$ <i>spoIVA</i> flanking 1109 bp | GATTGTAAGGTAATAGTTTTAGCAGTTCC                                          |
| 1744   | 3' $\Delta$ <i>spoIVA</i> flanking 1039 bp | CTAGATGTTTCTAATACCATATATTTGG                                           |
| 1746   | 5' $\Delta$ <i>spoIVA</i> SOE              | GGAGGAATAATATGAATAATAACATATACGTAATGAAGGAAGTTCTAATATTATAAC              |
| 1747   | 3' $\Delta$ <i>spoIVA</i> rev              | GTTATAATATTAGAATTCCTTCATTTACGTATATGTTATTATTCATATTATTCCTCC              |
| 2036   | 5' NotI <i>spoIVA</i> Gibson               | ttaggatgtaataag <u>cgccgc</u> CAATTAGCATTGTAGTTTACTAGTTTTTGTATATAGG    |
| 2037   | 3' XhoI <i>spoIVA</i> Gibson               | caagcttgcattgctgcaggcctc <u>gag</u> CCTTGAAACAATCCTGTGCGAAACATATAC     |
| 2148   | 5' NotI <i>CD25622</i> Gibson              | ggaattaggatgtaataag <u>cgccgc</u> GGTCTAAAATGGAAAAGTGTCCG              |
| 2149   | 3' XhoI <i>spoVM</i> Gibson                | gccaagcttgcattgctgcaggcctc <u>gag</u> GTTTAAAAGCCTACTTCCGTAAGTAGG      |
| 2177   | 5' <i>spoIVA</i> N491G SOE                 | CAAAAAATTGTAAATGAAGGAAGTTCTGGTATTATAACTATTTGTTATAAAAAATATAGC           |
| 2178   | 3' <i>spoIVA</i> N491G rev eos             | GCTATATTTTTATAACAAAATAGTTATAATACCAGAACTTCCTTCATTTACAATTTTTTG           |
| 2186   | 5' IBS1 <i>CD25622</i> 38                  | AAAAAAGCTTATAATTATCCTTAGTTGCCAGACAAGTGCGCCAGATAGGGTG                   |
| 2187   | 3' EBS1 $\delta$ <i>CD25622</i> 38         | CAGATTGTACAAATGTGGTGATAACAGATAAGTCAGACAAAGTAACTTACCTTTCTTTGT           |
| 2188   | 5' EBS2 <i>CD25622</i> 38                  | TGAACGCAAGTTTCTAATTCGATTGCAACTCGATAGAGGAAAGTGTCT                       |
| 2202   | 5' <i>PspoIVA-mCherry</i> SOE              | CCCTTAACTCTAAATATAATTTAATAAGATTAGATGGTATCTAAAGGAGAAGAAGATAAT           |
| 2203   | 3' <i>PspoIVA-mCherry</i> rev eos          | ATTATCTTCTTCTCCTTTAGATACCATCTAATCTTATTAATTTATTTAGAGTTAAGGG             |
| 2204   | 5' <i>mCherry-spoIVA</i> SOE               | GGAGGTATGGATGAATTATATAAAGTCGACATGTATAGGAGGAATAATATGAATAATAAC           |
| 2205   | 5' <i>mCherry-spoIVA</i> rev eos           | GTTATTATTCATATTATTCCTCCTATACATGTCGACTTTATATAATTCATCCATACCTCC           |
| 2272   | 5' AscI $\Delta$ <i>spoIVA</i> Gibson-YN3  | tcaattgtcaaaaaataatgc <u>GGCGCGCC</u> CAATTTATAAAAAGGACAAGTTATTG       |
| 2273   | 3' SbfI $\Delta$ <i>spoIVA</i> Gibson      | agcaaggcaagaccgatcgcc <u>CC</u> TGCAGGGACCTTTTATTTTCATCTAAATACACC      |

Restriction sites are underlined.

**Table S3. Expression levels of select sporulation genes as measured by RNA-Seq.**

| Name          | Spo0A |                     |                       | $\sigma^F$ |                     |                       | $\sigma^E$ |                     |                       | <i>spoIID</i> <sup>-</sup> |                     |       | $\sigma^K$ |                     |       |
|---------------|-------|---------------------|-----------------------|------------|---------------------|-----------------------|------------|---------------------|-----------------------|----------------------------|---------------------|-------|------------|---------------------|-------|
|               | BM    | log <sub>2</sub> FC | adj P                 | BM         | log <sub>2</sub> FC | adj P                 | BM         | log <sub>2</sub> FC | adj P                 | BM                         | log <sub>2</sub> FC | adj P | BM         | log <sub>2</sub> FC | adj P |
| <i>spoVM</i>  | 11    | -5.0                | 2.8x10 <sup>-5</sup>  | 13         | -2.4                | 0.01                  | 13         | -3.0                | 0.006                 | 24                         | 0.26                | 0.67  | 20         | 0.003               | 1     |
| <i>spoIVA</i> | 1147  | -10.2               | 2.7x10 <sup>-31</sup> | 1278       | -3.8                | 1.4x10 <sup>-18</sup> | 1266       | -8.6                | 9.7x10 <sup>-33</sup> | 1971                       | -0.59               | 0.09  | 1558       | -1.3                | 0.26  |
| <i>sipL</i>   | 655   | -6.4                | 2.1x10 <sup>-45</sup> | 746        | -3.2                | 2.8x10 <sup>-18</sup> | 730        | -5.5                | 2.7x10 <sup>-47</sup> | 1218                       | -0.28               | 0.42  | 902        | -1.2                | 0.37  |

*BM* (base mean) represents the mean of read counts after they were divided by size factors to adjust for different sequencing depths. This value is the mean of the sample relative to wild type. *log<sub>2</sub>FC* denotes log<sub>2</sub>fold-change. A negative value indicates that the gene was reduced in expression relative to wild type. *adj P* represents that adjusted p-value associated with the fold change determined. The RNA-Seq data in the indicated strains has been previously published (7).

**Table S4. Sporulation efficiency as measured by chloroform resistance.**

| Strain                    | Sporulation efficiency |
|---------------------------|------------------------|
| 630 $\Delta$ <i>erm</i>   | 1 ± 0.34               |
| $\Delta$ <i>spo0A</i>     | <10 <sup>-6</sup>      |
| <i>VM</i> <sup>-</sup>    | <b>0.21 ± 0.15</b>     |
| 25622 <sup>-</sup>        | <b>0.18 ± 0.05</b>     |
| <i>VM</i> <sup>-</sup> /C | 1.2 ± 1.0              |
| 25622 <sup>-</sup> /C     | 1.3 ± 1.1              |

Statistical significance relative to wild type 630 $\Delta$ *erm* based on a minimum of three biological replicates was determined using an unpaired t-test of the *VM* mutant strains relative to wild type. Bolded text represents p < 0.005. Analyzing the data using a one-way ANOVA and Tukey's test did not detect a statistically significant difference between the *VM* mutant strains and wild type.

**Table S5. Frequency of forespore morphological abnormalities detected by phase contrast microscopy.**

|                  | Free spores | Sporulating cells | Phase-bright forespores | Phase-dark forespores | Bearding | Misshapen forespores |
|------------------|-------------|-------------------|-------------------------|-----------------------|----------|----------------------|
| WT               | 23% (95)    | 77% (316)         | 56% (178)               | 44% (138)             | 4% (13)  | 1% (4)               |
| <i>VM-</i>       | 17% (74)    | 83% (349)         | 32% (113)               | 68% (236)             | 15% (52) | 13% (44)             |
| <i>CD25622-</i>  | 33% (178)   | 67% (359)         | 15% (55)                | 85% (304)             | 14% (50) | 12% (43)             |
| <i>VM-C</i>      | 17% (74)    | 83% (358)         | 46% (163)               | 54% (195)             | 4% (13)  | 2% (8)               |
| <i>CD25622-C</i> | 38% (257)   | 62% (426)         | 52% (222)               | 48% (204)             | 8% (32)  | 4% (17)              |

The percentage of free spores was determined by dividing the number of free spores (shown in parentheses) by the sum of free spores and sporulating cells (shown in parentheses) counted; the percentage of sporulating cells was determined accordingly. Sporulating cells include cells with phase-dark and phase-bright forespores but do not include cells that have completed asymmetric division, since these are indistinguishable from vegetative cells using phase-contrast microscopy. The percentage of phase-bright and phase-dark forespores, phase-dark extensions (bearding), and misshapen forespores was determined by dividing the number of cells with this phenotype (shown in parentheses) by the number of sporulating cells.

## Supplemental References

1. Dineen SS, Villapakkam AC, Nordman JT, Sonenshein AL. 2007. Repression of *Clostridium difficile* toxin gene expression by CodY. *Mol Microbiol* 66:206-19.
2. Ng YK, Ehsaan M, Philip S, Collery MM, Janoir C, Collignon A, Cartman ST, Minton NP. 2013. Expanding the repertoire of gene tools for precise manipulation of the *Clostridium difficile* genome: allelic exchange using *pyrE* alleles. *PLoS One* 8:e56051.
3. Donnelly ML, Li W, Li YQ, Hinkel L, Setlow P, Shen A. 2017. A *Clostridium difficile*-Specific, Gel-Forming Protein Required for Optimal Spore Germination. *MBio* 8.
4. Shen A, Lupardus PJ, Morell M, Ponder EL, Sadaghiani AM, Garcia KC, Bogoy M. 2009. Simplified, enhanced protein purification using an inducible, autoprocessing enzyme tag. *PLoS One* 4:e8119.
5. Putnam EE, Nock AM, Lawley TD, Shen A. 2013. SpoIVA and SipL are *Clostridium difficile* spore morphogenetic proteins. *J Bacteriol* 195:1214-25.
6. Ransom EM, Ellermeier CD, Weiss DS. 2015. Use of mCherry Red fluorescent protein for studies of protein localization and gene expression in *Clostridium difficile*. *Appl Environ Microbiol* 81:1652-60.
7. Pishdadian K, Fimlaid KA, Shen A. 2015. SpoIIID-mediated regulation of sigma(K) function during *Clostridium difficile* sporulation. *Mol Microbiol* 95:189-208.
